# Supplementary material for: Influence of the Preparation Method and Photo-Oxidation Treatment on the Thermal and Gas Transport Properties of Dense Films Based on a Poly(ether-block-amide) Copolymer
Source: PubMed Central journal article supplement (PMC6119977; doi:10.3390/ma11081326), 2018-07-31
Supplement: materials-11-01326-s001.pdf [file materials-11-01326-s001.pdf]

## Supplementary Information

**Table S1.** Diffusion coefficients of Pebax®2533 films at 25 °C (T0 samples).

| Solvent            | Diffusion coefficient ( $10^{-8} \text{ cm}^2 \text{ s}^{-1}$ ) |                 |                |                |      |                | Selectivity (-)                 |                                |
|--------------------|-----------------------------------------------------------------|-----------------|----------------|----------------|------|----------------|---------------------------------|--------------------------------|
|                    | CO <sub>2</sub>                                                 | CH <sub>4</sub> | O <sub>2</sub> | N <sub>2</sub> | He   | H <sub>2</sub> | CO <sub>2</sub> /N <sub>2</sub> | H <sub>2</sub> /N <sub>2</sub> |
| ethanol            | 133                                                             | 106             | 204            | 170            | 2300 | 1020           | 0.78                            | 6.0                            |
| <i>i</i> -propanol | 135                                                             | 102             | 220            | 202            | 1880 | 1070           | 0.67                            | 5.3                            |
| 1-butanol          | 133                                                             | 124             | 221            | 153            | 2590 | 1110           | 0.87                            | 7.2                            |
| HFIP               | 124                                                             | 99.5            | 203            | 135            | 2620 | 1110           | 0.92                            | 8.2                            |
| <i>Hot press</i>   | 158                                                             | 121             | 270            | 201            | 3030 | 1390           | 0.79                            | 6.9                            |

**Table S2.** Solubility coefficients of Pebax®2533 films at 25 °C (T0 samples).

| Solvent            | Solubility coefficient ( $\text{cm}^3 \text{ cm}^{-3} \text{ bar}^{-1}$ ) |                 |                |                |        |                | Selectivity (-)                 |                                |
|--------------------|---------------------------------------------------------------------------|-----------------|----------------|----------------|--------|----------------|---------------------------------|--------------------------------|
|                    | CO <sub>2</sub>                                                           | CH <sub>4</sub> | O <sub>2</sub> | N <sub>2</sub> | He     | H <sub>2</sub> | CO <sub>2</sub> /N <sub>2</sub> | H <sub>2</sub> /N <sub>2</sub> |
| ethanol            | 1.15                                                                      | 0.18            | 0.072          | 0.033          | 0.0069 | 0.027          | 35.0                            | 0.84                           |
| <i>i</i> -propanol | 1.12                                                                      | 0.19            | 0.066          | 0.029          | 0.0087 | 0.027          | 38.7                            | 0.92                           |
| 1-butanol          | 1.22                                                                      | 0.16            | 0.074          | 0.041          | 0.0074 | 0.029          | 27.4                            | 0.66                           |
| HFIP               | 1.21                                                                      | 0.19            | 0.075          | 0.046          | 0.0069 | 0.026          | 26.1                            | 0.56                           |
| <i>Hot press</i>   | 1.07                                                                      | 0.18            | 0.063          | 0.033          | 0.0059 | 0.022          | 32.2                            | 0.71                           |
